# Supplementary material
Source: publisher figshare collection journal article supplement (https://acs.figshare.com/ndownloader/files/3947653)
Supplement: Supplementary file 1 [file 3947653]

data_nw1006

 

_audit_creation_method            SHELXL-97

_chemical_name_systematic

;

 ?

;

_chemical_name_common             ?

_chemical_melting_point           ?

_chemical_formula_moiety          'C52 H32 N6 O8 Zn2' 

_chemical_formula_sum

 'C52 H32 N6 O8 Zn2'

_chemical_formula_weight          999.58

 

loop_

 _atom_type_symbol

 _atom_type_description

 _atom_type_scat_dispersion_real

 _atom_type_scat_dispersion_imag

 _atom_type_scat_source

 'C'  'C'   0.0033   0.0016

 'International Tables Vol C Tables 4.2.6.8 and 6.1.1.4'

 'H'  'H'   0.0000   0.0000

 'International Tables Vol C Tables 4.2.6.8 and 6.1.1.4'

 'N'  'N'   0.0061   0.0033

 'International Tables Vol C Tables 4.2.6.8 and 6.1.1.4'

 'O'  'O'   0.0106   0.0060

 'International Tables Vol C Tables 4.2.6.8 and 6.1.1.4'

 'Zn'  'Zn'   0.2839   1.4301

 'International Tables Vol C Tables 4.2.6.8 and 6.1.1.4'

 

_symmetry_cell_setting            Triclinic

_symmetry_space_group_name_H-M    P-1

_symmetry_space_group_name_Hall   '-P 1'

loop_

 _symmetry_equiv_pos_as_xyz

 'x, y, z'

 '-x, -y, -z'

 

_cell_length_a                    12.4642(19)

_cell_length_b                    12.5823(17)

_cell_length_c                    15.269(2)

_cell_angle_alpha                 104.357(2)

_cell_angle_beta                  108.967(2)

_cell_angle_gamma                 90.771(3)

_cell_volume                      2182.2(5)

_cell_formula_units_Z             2

_cell_measurement_temperature     296(2)

_cell_measurement_reflns_used     1044

_cell_measurement_theta_min       1.68

_cell_measurement_theta_max       20.04

 

_exptl_crystal_description        quadrate

_exptl_crystal_colour             colorless

_exptl_crystal_size_max           0.26

_exptl_crystal_size_mid           0.22

_exptl_crystal_size_min           0.18

_exptl_crystal_density_meas       ?

_exptl_crystal_density_diffrn     1.521

_exptl_crystal_density_method     'not measured'

_exptl_crystal_F_000              1020

_exptl_absorpt_coefficient_mu     1.165

_exptl_absorpt_correction_type    multi-scan

_exptl_absorpt_correction_T_min   0.742

_exptl_absorpt_correction_T_max   0.815

_exptl_absorpt_process_details    sadabs

 

_exptl_special_details

;

 ?

;

 

_diffrn_ambient_temperature       296(2)

_diffrn_radiation_wavelength      0.71073

_diffrn_radiation_type            MoK\a

_diffrn_radiation_source          'fine-focus sealed tube'

_diffrn_radiation_monochromator   graphite

_diffrn_measurement_device_type   'CCD area detector'

_diffrn_measurement_method        'phi and omega scans'

_diffrn_detector_area_resol_mean  512

_diffrn_standards_number          0

_diffrn_standards_interval_count  0

_diffrn_standards_interval_time   0

_diffrn_standards_decay_%         0

_diffrn_reflns_number             11124

_diffrn_reflns_av_R_equivalents   0.0460

_diffrn_reflns_av_sigmaI/netI     0.1071

_diffrn_reflns_limit_h_min        -14

_diffrn_reflns_limit_h_max        12

_diffrn_reflns_limit_k_min        -11

_diffrn_reflns_limit_k_max        14

_diffrn_reflns_limit_l_min        -17

_diffrn_reflns_limit_l_max        18

_diffrn_reflns_theta_min          1.68

_diffrn_reflns_theta_max          25.05

_reflns_number_total              7653

_reflns_number_gt                 5293

_reflns_threshold_expression      >2sigma(I)

 

_computing_data_collection        'Bruker SMART'

_computing_cell_refinement        'Bruker SMART'

_computing_data_reduction         'Bruker SAINT'

_computing_structure_solution     'SHELXS-97 (Sheldrick, 1990)'

_computing_structure_refinement   'SHELXL-97 (Sheldrick, 1997)'

_computing_molecular_graphics     'Bruker SHELXTL'

_computing_publication_material   'Bruker SHELXTL'

 

_refine_special_details

;

 Refinement of F^2^ against ALL reflections.  The weighted R-factor wR and

 goodness of fit S are based on F^2^, conventional R-factors R are based

 on F, with F set to zero for negative F^2^. The threshold expression of

 F^2^ > 2sigma(F^2^) is used only for calculating R-factors(gt) etc. and is

 not relevant to the choice of reflections for refinement.  R-factors based

 on F^2^ are statistically about twice as large as those based on F, and R-

 factors based on ALL data will be even larger.

;

 

_refine_ls_structure_factor_coef  Fsqd

_refine_ls_matrix_type            full

_refine_ls_weighting_scheme       calc

_refine_ls_weighting_details

 'calc w=1/[\s^2^(Fo^2^)+(0.0412P)^2^+2.1841P] where P=(Fo^2^+2Fc^2^)/3'

_atom_sites_solution_primary      direct

_atom_sites_solution_secondary    difmap

_atom_sites_solution_hydrogens    geom

_refine_ls_hydrogen_treatment     constr

_refine_ls_extinction_method      none

_refine_ls_extinction_coef        ?

_refine_ls_number_reflns          7653

_refine_ls_number_parameters      613

_refine_ls_number_restraints      0

_refine_ls_R_factor_all           0.1129

_refine_ls_R_factor_gt            0.0756

_refine_ls_wR_factor_ref          0.1463

_refine_ls_wR_factor_gt           0.1281

_refine_ls_goodness_of_fit_ref    1.046

_refine_ls_restrained_S_all       1.046

_refine_ls_shift/su_max           0.000

_refine_ls_shift/su_mean          0.000

 

loop_

 _atom_site_label

 _atom_site_type_symbol

 _atom_site_fract_x

 _atom_site_fract_y

 _atom_site_fract_z

 _atom_site_U_iso_or_equiv

 _atom_site_adp_type

 _atom_site_occupancy

 _atom_site_symmetry_multiplicity

 _atom_site_calc_flag

 _atom_site_refinement_flags

 _atom_site_disorder_assembly

 _atom_site_disorder_group

Zn1 Zn 0.48459(6) -0.01136(6) 0.39925(5) 0.0310(2) Uani 1 1 d . . .

Zn2 Zn 0.19540(6) -0.47051(5) -0.09406(5) 0.0318(2) Uani 1 1 d . . .

N1 N 0.1823(4) -0.3163(4) -0.0105(3) 0.0308(12) Uani 1 1 d . . .

N2 N 0.1663(4) 0.0869(4) 0.0963(3) 0.0276(11) Uani 1 1 d . . .

N3 N 0.2073(4) 0.4315(4) -0.0057(3) 0.0326(12) Uani 1 1 d . . .

N4 N 0.4829(4) -0.0438(4) 0.2622(3) 0.0290(12) Uani 1 1 d . . .

N5 N 0.3423(4) -0.0866(4) -0.0924(3) 0.0289(11) Uani 1 1 d . . .

N6 N 0.0698(6) 0.0703(6) -0.3414(6) 0.073(2) Uani 1 1 d . . .

O1 O 0.3579(4) 0.0892(4) 0.3975(3) 0.0458(12) Uani 1 1 d . . .

O2 O 0.3870(4) 0.1022(4) 0.5517(3) 0.0512(13) Uani 1 1 d . . .

O3 O 0.3112(4) -0.4410(4) -0.1437(3) 0.0510(13) Uani 1 1 d . . .

O4 O 0.3773(8) -0.5991(6) -0.1517(7) 0.157(4) Uani 1 1 d . . .

O5 O 0.5966(4) 0.1264(4) 0.4590(3) 0.0463(12) Uani 1 1 d . . .

O6 O 0.6345(4) 0.1375(3) 0.6147(3) 0.0478(12) Uani 1 1 d . . .

O7 O 1.0571(4) 0.5058(4) 0.7958(3) 0.0535(13) Uani 1 1 d . . .

O8 O 1.0004(6) 0.3602(5) 0.8306(4) 0.110(3) Uani 1 1 d . . .

C1 C 0.2217(5) -0.2837(5) 0.0859(4) 0.0339(15) Uani 1 1 d . . .

H1 H 0.2580 -0.3334 0.1189 0.041 Uiso 1 1 calc R . .

C2 C 0.2115(5) -0.1807(4) 0.1387(4) 0.0305(14) Uani 1 1 d . . .

H2 H 0.2381 -0.1626 0.2054 0.037 Uiso 1 1 calc R . .

C3 C 0.1609(5) -0.1043(4) 0.0904(4) 0.0247(13) Uani 1 1 d . . .

C4 C 0.1217(5) -0.1375(5) -0.0095(4) 0.0300(14) Uani 1 1 d . . .

H4 H 0.0874 -0.0886 -0.0443 0.036 Uiso 1 1 calc R . .

C5 C 0.1335(5) -0.2413(5) -0.0563(4) 0.0321(14) Uani 1 1 d . . .

H5 H 0.1065 -0.2616 -0.1231 0.039 Uiso 1 1 calc R . .

C6 C 0.1576(5) 0.0110(4) 0.1431(4) 0.0239(13) Uani 1 1 d . . .

C7 C 0.1523(5) 0.0401(4) 0.2361(4) 0.0302(14) Uani 1 1 d . . .

H7 H 0.1450 -0.0148 0.2655 0.036 Uiso 1 1 calc R . .

C8 C 0.1578(5) 0.1491(4) 0.2844(4) 0.0281(14) Uani 1 1 d . . .

C9 C 0.1667(5) 0.2262(5) 0.2356(4) 0.0302(14) Uani 1 1 d . . .

H9 H 0.1696 0.3008 0.2652 0.036 Uiso 1 1 calc R . .

C10 C 0.1712(5) 0.1940(5) 0.1435(4) 0.0296(14) Uani 1 1 d . . .

C11 C 0.2518(6) 0.3346(5) -0.0196(4) 0.0394(16) Uani 1 1 d . . .

H11 H 0.2916 0.3199 -0.0626 0.047 Uiso 1 1 calc R . .

C12 C 0.2413(5) 0.2563(5) 0.0262(4) 0.0380(16) Uani 1 1 d . . .

H12 H 0.2731 0.1902 0.0137 0.046 Uiso 1 1 calc R . .

C13 C 0.1834(5) 0.2753(4) 0.0913(4) 0.0269(13) Uani 1 1 d . . .

C14 C 0.1365(5) 0.3748(5) 0.1055(4) 0.0356(15) Uani 1 1 d . . .

H14 H 0.0967 0.3914 0.1484 0.043 Uiso 1 1 calc R . .

C15 C 0.1493(5) 0.4490(5) 0.0556(4) 0.0358(15) Uani 1 1 d . . .

H15 H 0.1159 0.5146 0.0651 0.043 Uiso 1 1 calc R . .

C16 C 0.1481(5) 0.1897(5) 0.3819(4) 0.0323(15) Uani 1 1 d . . .

C17 C 0.0533(6) 0.2467(5) 0.3861(5) 0.0440(17) Uani 1 1 d . . .

H17 H 0.0009 0.2549 0.3294 0.053 Uiso 1 1 calc R . .

C18 C 0.0355(7) 0.2909(6) 0.4717(5) 0.062(2) Uani 1 1 d . . .

H18 H -0.0285 0.3276 0.4728 0.074 Uiso 1 1 calc R . .

C19 C 0.1133(7) 0.2801(6) 0.5550(5) 0.064(2) Uani 1 1 d . . .

H19 H 0.1026 0.3106 0.6132 0.077 Uiso 1 1 calc R . .

C20 C 0.2071(6) 0.2247(6) 0.5536(5) 0.053(2) Uani 1 1 d . . .

H20 H 0.2588 0.2177 0.6111 0.064 Uiso 1 1 calc R . .

C21 C 0.2266(6) 0.1787(5) 0.4677(4) 0.0358(15) Uani 1 1 d . . .

C22 C 0.3319(6) 0.1194(5) 0.4726(5) 0.0372(16) Uani 1 1 d . . .

C23 C 0.5176(6) -0.1360(5) 0.2219(4) 0.0413(17) Uani 1 1 d . . .

H23 H 0.5553 -0.1794 0.2611 0.050 Uiso 1 1 calc R . .

C24 C 0.5013(5) -0.1715(5) 0.1253(4) 0.0354(15) Uani 1 1 d . . .

H24 H 0.5280 -0.2370 0.1008 0.042 Uiso 1 1 calc R . .

C25 C 0.4447(5) -0.1089(4) 0.0643(4) 0.0249(13) Uani 1 1 d . . .

C26 C 0.4123(5) -0.0110(4) 0.1074(4) 0.0267(13) Uani 1 1 d . . .

H26 H 0.3761 0.0351 0.0704 0.032 Uiso 1 1 calc R . .

C27 C 0.4332(5) 0.0191(5) 0.2048(4) 0.0309(14) Uani 1 1 d . . .

H27 H 0.4118 0.0864 0.2320 0.037 Uiso 1 1 calc R . .

C28 C 0.4130(5) -0.1468(5) -0.0421(4) 0.0261(13) Uani 1 1 d . . .

C29 C 0.4532(5) -0.2386(5) -0.0854(4) 0.0288(14) Uani 1 1 d . . .

H29 H 0.5045 -0.2762 -0.0479 0.035 Uiso 1 1 calc R . .

C30 C 0.4182(5) -0.2760(5) -0.1841(4) 0.0297(14) Uani 1 1 d . . .

C31 C 0.3459(5) -0.2141(5) -0.2359(4) 0.0348(15) Uani 1 1 d . . .

H31 H 0.3220 -0.2351 -0.3027 0.042 Uiso 1 1 calc R . .

C32 C 0.3089(5) -0.1206(5) -0.1889(4) 0.0310(14) Uani 1 1 d . . .

C33 C 0.0960(7) 0.0836(6) -0.2473(6) 0.060(2) Uani 1 1 d . . .

H33 H 0.0614 0.1363 -0.2141 0.073 Uiso 1 1 calc R . .

C34 C 0.1724(6) 0.0229(5) -0.1961(5) 0.0469(18) Uani 1 1 d . . .

H34 H 0.1859 0.0339 -0.1307 0.056 Uiso 1 1 calc R . .

C35 C 0.2277(5) -0.0532(5) -0.2418(4) 0.0363(15) Uani 1 1 d . . .

C36 C 0.2037(6) -0.0642(6) -0.3391(5) 0.0514(19) Uani 1 1 d . . .

H36 H 0.2409 -0.1123 -0.3735 0.062 Uiso 1 1 calc R . .

C37 C 0.1239(8) -0.0029(7) -0.3841(6) 0.074(3) Uani 1 1 d . . .

H37 H 0.1069 -0.0140 -0.4499 0.089 Uiso 1 1 calc R . .

C38 C 0.4615(5) -0.3751(5) -0.2336(4) 0.0341(15) Uani 1 1 d . . .

C39 C 0.5228(5) -0.3606(5) -0.2919(5) 0.0427(17) Uani 1 1 d . . .

H39 H 0.5325 -0.2910 -0.3005 0.051 Uiso 1 1 calc R . .

C40 C 0.5692(7) -0.4455(7) -0.3368(6) 0.071(3) Uani 1 1 d . . .

H40 H 0.6094 -0.4333 -0.3757 0.085 Uiso 1 1 calc R . .

C41 C 0.5569(9) -0.5474(8) -0.3250(7) 0.101(4) Uani 1 1 d . . .

H41 H 0.5876 -0.6059 -0.3561 0.121 Uiso 1 1 calc R . .

C42 C 0.4981(9) -0.5632(7) -0.2661(7) 0.098(4) Uani 1 1 d . . .

H42 H 0.4926 -0.6327 -0.2559 0.117 Uiso 1 1 calc R . .

C43 C 0.4470(6) -0.4805(6) -0.2216(5) 0.052(2) Uani 1 1 d . . .

C44 C 0.3739(7) -0.5089(6) -0.1669(6) 0.061(2) Uani 1 1 d . . .

C45 C 0.6465(5) 0.1708(5) 0.5465(5) 0.0354(15) Uani 1 1 d . . .

C46 C 0.7289(5) 0.2709(5) 0.5722(4) 0.0306(14) Uani 1 1 d . . .

C47 C 0.7105(6) 0.3393(5) 0.5113(5) 0.0414(17) Uani 1 1 d . . .

H47 H 0.6495 0.3218 0.4537 0.050 Uiso 1 1 calc R . .

C48 C 0.7838(6) 0.4339(6) 0.5372(5) 0.0499(19) Uani 1 1 d . . .

H48 H 0.7710 0.4807 0.4971 0.060 Uiso 1 1 calc R . .

C49 C 0.8757(6) 0.4599(5) 0.6216(5) 0.0451(18) Uani 1 1 d . . .

H49 H 0.9253 0.5231 0.6378 0.054 Uiso 1 1 calc R . .

C50 C 0.8934(5) 0.3919(5) 0.6817(4) 0.0351(15) Uani 1 1 d . . .

C51 C 0.8210(5) 0.2995(5) 0.6574(4) 0.0352(15) Uani 1 1 d . . .

H51 H 0.8335 0.2543 0.6989 0.042 Uiso 1 1 calc R . .

C52 C 0.9931(6) 0.4191(6) 0.7751(5) 0.0459(18) Uani 1 1 d . . .

 

loop_

 _atom_site_aniso_label

 _atom_site_aniso_U_11

 _atom_site_aniso_U_22

 _atom_site_aniso_U_33

 _atom_site_aniso_U_23

 _atom_site_aniso_U_13

 _atom_site_aniso_U_12

Zn1 0.0346(4) 0.0363(4) 0.0181(4) 0.0022(3) 0.0076(3) 0.0021(3)

Zn2 0.0399(5) 0.0221(4) 0.0370(5) 0.0088(3) 0.0170(4) 0.0044(3)

N1 0.038(3) 0.022(3) 0.030(3) 0.006(2) 0.008(2) 0.001(2)

N2 0.029(3) 0.021(3) 0.030(3) 0.009(2) 0.005(2) 0.008(2)

N3 0.038(3) 0.025(3) 0.034(3) 0.012(2) 0.009(3) 0.006(2)

N4 0.037(3) 0.023(3) 0.025(3) 0.003(2) 0.012(2) 0.005(2)

N5 0.037(3) 0.026(3) 0.025(3) 0.005(2) 0.014(2) 0.004(2)

N6 0.066(5) 0.083(5) 0.077(5) 0.044(5) 0.016(4) 0.026(4)

O1 0.052(3) 0.053(3) 0.033(3) 0.009(2) 0.018(2) 0.018(2)

O2 0.058(3) 0.066(3) 0.032(3) 0.016(2) 0.016(2) 0.022(3)

O3 0.053(3) 0.042(3) 0.074(4) 0.016(3) 0.042(3) 0.014(2)

O4 0.252(10) 0.097(5) 0.266(10) 0.125(6) 0.220(9) 0.107(6)

O5 0.045(3) 0.049(3) 0.031(3) -0.005(2) 0.008(2) -0.014(2)

O6 0.052(3) 0.050(3) 0.035(3) 0.007(2) 0.010(2) -0.016(2)

O7 0.054(3) 0.043(3) 0.052(3) -0.001(2) 0.012(3) -0.012(2)

O8 0.111(6) 0.096(5) 0.074(4) 0.033(4) -0.038(4) -0.036(4)

C1 0.044(4) 0.025(3) 0.034(4) 0.017(3) 0.009(3) 0.002(3)

C2 0.044(4) 0.021(3) 0.027(3) 0.009(3) 0.010(3) -0.003(3)

C3 0.025(3) 0.022(3) 0.027(3) 0.002(3) 0.012(3) -0.001(2)

C4 0.030(3) 0.027(3) 0.029(4) 0.010(3) 0.003(3) 0.003(3)

C5 0.036(4) 0.026(3) 0.033(4) 0.008(3) 0.011(3) 0.006(3)

C6 0.031(3) 0.017(3) 0.022(3) 0.005(2) 0.006(3) 0.005(2)

C7 0.038(4) 0.021(3) 0.029(4) 0.005(3) 0.010(3) 0.004(3)

C8 0.032(4) 0.022(3) 0.028(3) 0.005(3) 0.008(3) 0.004(3)

C9 0.042(4) 0.019(3) 0.030(4) 0.005(3) 0.014(3) 0.006(3)

C10 0.030(4) 0.027(3) 0.034(4) 0.012(3) 0.011(3) 0.002(3)

C11 0.053(4) 0.034(4) 0.043(4) 0.020(3) 0.024(3) 0.021(3)

C12 0.051(4) 0.029(4) 0.039(4) 0.013(3) 0.017(3) 0.014(3)

C13 0.032(4) 0.024(3) 0.023(3) 0.008(3) 0.007(3) 0.000(3)

C14 0.047(4) 0.027(3) 0.040(4) 0.009(3) 0.023(3) 0.006(3)

C15 0.044(4) 0.022(3) 0.045(4) 0.009(3) 0.020(3) 0.006(3)

C16 0.050(4) 0.026(3) 0.024(3) 0.005(3) 0.017(3) 0.008(3)

C17 0.047(4) 0.057(5) 0.037(4) 0.020(3) 0.020(3) 0.024(4)

C18 0.065(6) 0.081(6) 0.055(5) 0.024(5) 0.035(5) 0.036(4)

C19 0.083(6) 0.074(6) 0.048(5) 0.010(4) 0.044(5) 0.041(5)

C20 0.064(5) 0.072(5) 0.030(4) 0.019(4) 0.021(4) 0.030(4)

C21 0.048(4) 0.033(4) 0.030(4) 0.011(3) 0.017(3) 0.013(3)

C22 0.042(4) 0.035(4) 0.033(4) 0.007(3) 0.012(3) 0.004(3)

C23 0.055(5) 0.048(4) 0.023(4) 0.017(3) 0.010(3) 0.022(3)

C24 0.049(4) 0.028(3) 0.030(4) 0.003(3) 0.018(3) 0.018(3)

C25 0.028(3) 0.028(3) 0.018(3) 0.001(3) 0.011(3) 0.007(3)

C26 0.029(3) 0.027(3) 0.028(3) 0.013(3) 0.010(3) 0.006(3)

C27 0.038(4) 0.023(3) 0.029(4) -0.002(3) 0.015(3) -0.003(3)

C28 0.026(3) 0.030(3) 0.025(3) 0.008(3) 0.012(3) -0.002(3)

C29 0.032(4) 0.032(4) 0.023(3) 0.009(3) 0.009(3) 0.002(3)

C30 0.029(3) 0.035(4) 0.025(3) 0.002(3) 0.012(3) 0.003(3)

C31 0.042(4) 0.043(4) 0.022(3) 0.009(3) 0.015(3) 0.009(3)

C32 0.026(3) 0.035(4) 0.032(4) 0.006(3) 0.013(3) -0.002(3)

C33 0.067(6) 0.050(5) 0.073(6) 0.019(4) 0.032(5) 0.031(4)

C34 0.049(5) 0.045(4) 0.053(5) 0.018(4) 0.020(4) 0.016(3)

C35 0.035(4) 0.040(4) 0.032(4) 0.014(3) 0.007(3) 0.004(3)

C36 0.060(5) 0.063(5) 0.038(4) 0.026(4) 0.017(4) 0.019(4)

C37 0.092(7) 0.082(7) 0.057(6) 0.043(5) 0.019(5) 0.027(5)

C38 0.029(4) 0.038(4) 0.035(4) 0.005(3) 0.014(3) 0.006(3)

C39 0.040(4) 0.041(4) 0.045(4) 0.004(3) 0.017(3) 0.001(3)

C40 0.079(6) 0.065(6) 0.087(7) 0.003(5) 0.066(6) 0.012(5)

C41 0.133(9) 0.072(7) 0.143(10) 0.020(6) 0.112(8) 0.050(6)

C42 0.141(9) 0.048(5) 0.159(10) 0.031(6) 0.120(9) 0.038(6)

C43 0.060(5) 0.050(5) 0.064(5) 0.017(4) 0.042(4) 0.021(4)

C44 0.075(6) 0.045(5) 0.084(6) 0.026(4) 0.049(5) 0.018(4)

C45 0.034(4) 0.032(4) 0.034(4) -0.004(3) 0.013(3) -0.001(3)

C46 0.029(4) 0.027(3) 0.029(4) -0.003(3) 0.008(3) 0.003(3)

C47 0.040(4) 0.046(4) 0.032(4) -0.003(3) 0.013(3) 0.004(3)

C48 0.069(5) 0.046(4) 0.045(5) 0.018(4) 0.027(4) 0.014(4)

C49 0.057(5) 0.032(4) 0.044(4) -0.002(3) 0.024(4) -0.005(3)

C50 0.032(4) 0.030(4) 0.037(4) -0.001(3) 0.011(3) 0.002(3)

C51 0.036(4) 0.036(4) 0.033(4) 0.008(3) 0.013(3) -0.001(3)

C52 0.050(5) 0.037(4) 0.039(4) -0.002(3) 0.009(4) 0.004(4)

 

_geom_special_details

;

 All esds (except the esd in the dihedral angle between two l.s. planes)

 are estimated using the full covariance matrix.  The cell esds are taken

 into account individually in the estimation of esds in distances, angles

 and torsion angles; correlations between esds in cell parameters are only

 used when they are defined by crystal symmetry.  An approximate (isotropic)

 treatment of cell esds is used for estimating esds involving l.s. planes.

;

 

loop_

 _geom_bond_atom_site_label_1

 _geom_bond_atom_site_label_2

 _geom_bond_distance

 _geom_bond_site_symmetry_2

 _geom_bond_publ_flag

Zn1 N4 2.023(5) . ?

Zn1 O5 2.027(4) . ?

Zn1 O2 2.030(5) 2_656 ?

Zn1 O1 2.034(4) . ?

Zn1 O6 2.082(4) 2_656 ?

Zn1 Zn1 2.9135(14) 2_656 ?

Zn2 O3 1.906(4) . ?

Zn2 O7 1.935(5) 1_444 ?

Zn2 N3 2.016(5) 1_545 ?

Zn2 N1 2.082(5) . ?

N1 C1 1.342(7) . ?

N1 C5 1.347(7) . ?

N2 C6 1.350(6) . ?

N2 C10 1.352(7) . ?

N3 C15 1.337(7) . ?

N3 C11 1.343(7) . ?

N3 Zn2 2.017(5) 1_565 ?

N4 C23 1.320(7) . ?

N4 C27 1.335(7) . ?

N5 C28 1.344(7) . ?

N5 C32 1.346(7) . ?

N6 C37 1.315(10) . ?

N6 C33 1.332(9) . ?

O1 C22 1.262(7) . ?

O2 C22 1.254(7) . ?

O2 Zn1 2.030(5) 2_656 ?

O3 C44 1.231(8) . ?

O4 C44 1.212(8) . ?

O5 C45 1.251(7) . ?

O6 C45 1.264(7) . ?

O6 Zn1 2.082(4) 2_656 ?

O7 C52 1.253(8) . ?

O7 Zn2 1.935(5) 1_666 ?

O8 C52 1.239(8) . ?

C1 C2 1.378(7) . ?

C1 H1 0.9300 . ?

C2 C3 1.389(7) . ?

C2 H2 0.9300 . ?

C3 C4 1.390(7) . ?

C3 C6 1.483(7) . ?

C4 C5 1.360(7) . ?

C4 H4 0.9300 . ?

C5 H5 0.9300 . ?

C6 C7 1.399(7) . ?

C7 C8 1.377(7) . ?

C7 H7 0.9300 . ?

C8 C9 1.384(7) . ?

C8 C16 1.495(8) . ?

C9 C10 1.384(8) . ?

C9 H9 0.9300 . ?

C10 C13 1.477(7) . ?

C11 C12 1.369(8) . ?

C11 H11 0.9300 . ?

C12 C13 1.385(8) . ?

C12 H12 0.9300 . ?

C13 C14 1.387(8) . ?

C14 C15 1.381(8) . ?

C14 H14 0.9300 . ?

C15 H15 0.9300 . ?

C16 C21 1.397(8) . ?

C16 C17 1.402(8) . ?

C17 C18 1.378(9) . ?

C17 H17 0.9300 . ?

C18 C19 1.365(10) . ?

C18 H18 0.9300 . ?

C19 C20 1.373(9) . ?

C19 H19 0.9300 . ?

C20 C21 1.395(8) . ?

C20 H20 0.9300 . ?

C21 C22 1.509(8) . ?

C23 C24 1.375(8) . ?

C23 H23 0.9300 . ?

C24 C25 1.391(8) . ?

C24 H24 0.9300 . ?

C25 C26 1.377(7) . ?

C25 C28 1.488(7) . ?

C26 C27 1.374(7) . ?

C26 H26 0.9300 . ?

C27 H27 0.9300 . ?

C28 C29 1.370(7) . ?

C29 C30 1.377(7) . ?

C29 H29 0.9300 . ?

C30 C31 1.381(8) . ?

C30 C38 1.495(8) . ?

C31 C32 1.387(8) . ?

C31 H31 0.9300 . ?

C32 C35 1.492(8) . ?

C33 C34 1.391(9) . ?

C33 H33 0.9300 . ?

C34 C35 1.370(8) . ?

C34 H34 0.9300 . ?

C35 C36 1.387(8) . ?

C36 C37 1.377(10) . ?

C36 H36 0.9300 . ?

C37 H37 0.9300 . ?

C38 C39 1.389(8) . ?

C38 C43 1.399(8) . ?

C39 C40 1.363(9) . ?

C39 H39 0.9300 . ?

C40 C41 1.352(11) . ?

C40 H40 0.9300 . ?

C41 C42 1.378(11) . ?

C41 H41 0.9300 . ?

C42 C43 1.377(9) . ?

C42 H42 0.9300 . ?

C43 C44 1.514(9) . ?

C45 C46 1.501(8) . ?

C46 C47 1.387(8) . ?

C46 C51 1.388(8) . ?

C47 C48 1.382(9) . ?

C47 H47 0.9300 . ?

C48 C49 1.379(9) . ?

C48 H48 0.9300 . ?

C49 C50 1.374(8) . ?

C49 H49 0.9300 . ?

C50 C51 1.357(8) . ?

C50 C52 1.513(9) . ?

C51 H51 0.9300 . ?

 

loop_

 _geom_angle_atom_site_label_1

 _geom_angle_atom_site_label_2

 _geom_angle_atom_site_label_3

 _geom_angle

 _geom_angle_site_symmetry_1

 _geom_angle_site_symmetry_3

 _geom_angle_publ_flag

N4 Zn1 O5 99.69(18) . . ?

N4 Zn1 O2 97.67(18) . 2_656 ?

O5 Zn1 O2 89.39(19) . 2_656 ?

N4 Zn1 O1 102.01(18) . . ?

O5 Zn1 O1 87.49(18) . . ?

O2 Zn1 O1 160.32(17) 2_656 . ?

N4 Zn1 O6 100.12(18) . 2_656 ?

O5 Zn1 O6 160.08(17) . 2_656 ?

O2 Zn1 O6 90.05(19) 2_656 2_656 ?

O1 Zn1 O6 86.36(19) . 2_656 ?

N4 Zn1 Zn1 170.80(14) . 2_656 ?

O5 Zn1 Zn1 80.98(12) . 2_656 ?

O2 Zn1 Zn1 73.15(12) 2_656 2_656 ?

O1 Zn1 Zn1 87.17(12) . 2_656 ?

O6 Zn1 Zn1 79.81(12) 2_656 2_656 ?

O3 Zn2 O7 103.3(2) . 1_444 ?

O3 Zn2 N3 124.9(2) . 1_545 ?

O7 Zn2 N3 116.9(2) 1_444 1_545 ?

O3 Zn2 N1 103.25(19) . . ?

O7 Zn2 N1 102.47(19) 1_444 . ?

N3 Zn2 N1 103.10(19) 1_545 . ?

C1 N1 C5 116.8(5) . . ?

C1 N1 Zn2 125.4(4) . . ?

C5 N1 Zn2 117.8(4) . . ?

C6 N2 C10 117.1(5) . . ?

C15 N3 C11 116.7(5) . . ?

C15 N3 Zn2 120.2(4) . 1_565 ?

C11 N3 Zn2 121.6(4) . 1_565 ?

C23 N4 C27 116.7(5) . . ?

C23 N4 Zn1 121.1(4) . . ?

C27 N4 Zn1 121.6(4) . . ?

C28 N5 C32 117.8(5) . . ?

C37 N6 C33 115.7(7) . . ?

C22 O1 Zn1 118.0(4) . . ?

C22 O2 Zn1 136.7(4) . 2_656 ?

C44 O3 Zn2 124.3(5) . . ?

C45 O5 Zn1 127.4(4) . . ?

C45 O6 Zn1 125.6(4) . 2_656 ?

C52 O7 Zn2 117.3(5) . 1_666 ?

N1 C1 C2 123.6(5) . . ?

N1 C1 H1 118.2 . . ?

C2 C1 H1 118.2 . . ?

C1 C2 C3 118.9(5) . . ?

C1 C2 H2 120.6 . . ?

C3 C2 H2 120.6 . . ?

C2 C3 C4 117.5(5) . . ?

C2 C3 C6 121.3(5) . . ?

C4 C3 C6 121.1(5) . . ?

C5 C4 C3 120.1(5) . . ?

C5 C4 H4 120.0 . . ?

C3 C4 H4 120.0 . . ?

N1 C5 C4 123.2(6) . . ?

N1 C5 H5 118.4 . . ?

C4 C5 H5 118.4 . . ?

N2 C6 C7 122.3(5) . . ?

N2 C6 C3 114.6(5) . . ?

C7 C6 C3 123.0(5) . . ?

C8 C7 C6 120.5(5) . . ?

C8 C7 H7 119.7 . . ?

C6 C7 H7 119.7 . . ?

C7 C8 C9 116.6(5) . . ?

C7 C8 C16 125.3(5) . . ?

C9 C8 C16 118.1(5) . . ?

C10 C9 C8 121.1(5) . . ?

C10 C9 H9 119.5 . . ?

C8 C9 H9 119.5 . . ?

N2 C10 C9 122.3(5) . . ?

N2 C10 C13 115.9(5) . . ?

C9 C10 C13 121.8(5) . . ?

N3 C11 C12 123.3(6) . . ?

N3 C11 H11 118.4 . . ?

C12 C11 H11 118.4 . . ?

C11 C12 C13 120.1(6) . . ?

C11 C12 H12 119.9 . . ?

C13 C12 H12 119.9 . . ?

C12 C13 C14 116.9(5) . . ?

C12 C13 C10 122.1(5) . . ?

C14 C13 C10 120.9(5) . . ?

C15 C14 C13 119.6(6) . . ?

C15 C14 H14 120.2 . . ?

C13 C14 H14 120.2 . . ?

N3 C15 C14 123.4(6) . . ?

N3 C15 H15 118.3 . . ?

C14 C15 H15 118.3 . . ?

C21 C16 C17 118.4(5) . . ?

C21 C16 C8 125.7(5) . . ?

C17 C16 C8 115.9(5) . . ?

C18 C17 C16 121.9(6) . . ?

C18 C17 H17 119.1 . . ?

C16 C17 H17 119.1 . . ?

C19 C18 C17 119.0(7) . . ?

C19 C18 H18 120.5 . . ?

C17 C18 H18 120.5 . . ?

C18 C19 C20 120.6(7) . . ?

C18 C19 H19 119.7 . . ?

C20 C19 H19 119.7 . . ?

C19 C20 C21 121.4(7) . . ?

C19 C20 H20 119.3 . . ?

C21 C20 H20 119.3 . . ?

C20 C21 C16 118.7(6) . . ?

C20 C21 C22 118.0(6) . . ?

C16 C21 C22 123.3(5) . . ?

O2 C22 O1 124.4(6) . . ?

O2 C22 C21 117.0(6) . . ?

O1 C22 C21 118.5(6) . . ?

N4 C23 C24 123.9(6) . . ?

N4 C23 H23 118.1 . . ?

C24 C23 H23 118.1 . . ?

C23 C24 C25 119.7(5) . . ?

C23 C24 H24 120.2 . . ?

C25 C24 H24 120.2 . . ?

C26 C25 C24 116.1(5) . . ?

C26 C25 C28 120.7(5) . . ?

C24 C25 C28 123.1(5) . . ?

C27 C26 C25 120.5(5) . . ?

C27 C26 H26 119.7 . . ?

C25 C26 H26 119.7 . . ?

N4 C27 C26 123.0(5) . . ?

N4 C27 H27 118.5 . . ?

C26 C27 H27 118.5 . . ?

N5 C28 C29 122.4(5) . . ?

N5 C28 C25 116.2(5) . . ?

C29 C28 C25 121.4(5) . . ?

C28 C29 C30 120.6(6) . . ?

C28 C29 H29 119.7 . . ?

C30 C29 H29 119.7 . . ?

C29 C30 C31 117.0(6) . . ?

C29 C30 C38 121.9(6) . . ?

C31 C30 C38 120.9(5) . . ?

C30 C31 C32 120.3(5) . . ?

C30 C31 H31 119.9 . . ?

C32 C31 H31 119.9 . . ?

N5 C32 C31 121.8(6) . . ?

N5 C32 C35 115.9(5) . . ?

C31 C32 C35 122.3(5) . . ?

N6 C33 C34 123.4(7) . . ?

N6 C33 H33 118.3 . . ?

C34 C33 H33 118.3 . . ?

C35 C34 C33 120.1(7) . . ?

C35 C34 H34 119.9 . . ?

C33 C34 H34 119.9 . . ?

C34 C35 C36 116.5(6) . . ?

C34 C35 C32 121.2(6) . . ?

C36 C35 C32 122.3(6) . . ?

C37 C36 C35 119.1(7) . . ?

C37 C36 H36 120.5 . . ?

C35 C36 H36 120.5 . . ?

N6 C37 C36 125.2(8) . . ?

N6 C37 H37 117.4 . . ?

C36 C37 H37 117.4 . . ?

C39 C38 C43 118.4(6) . . ?

C39 C38 C30 118.0(6) . . ?

C43 C38 C30 123.6(5) . . ?

C40 C39 C38 121.9(7) . . ?

C40 C39 H39 119.0 . . ?

C38 C39 H39 119.0 . . ?

C41 C40 C39 120.2(7) . . ?

C41 C40 H40 119.9 . . ?

C39 C40 H40 119.9 . . ?

C40 C41 C42 118.9(8) . . ?

C40 C41 H41 120.6 . . ?

C42 C41 H41 120.6 . . ?

C41 C42 C43 122.8(8) . . ?

C41 C42 H42 118.6 . . ?

C43 C42 H42 118.6 . . ?

C42 C43 C38 117.8(7) . . ?

C42 C43 C44 118.7(7) . . ?

C38 C43 C44 123.4(6) . . ?

O4 C44 O3 123.7(7) . . ?

O4 C44 C43 118.0(7) . . ?

O3 C44 C43 118.2(6) . . ?

O5 C45 O6 125.5(6) . . ?

O5 C45 C46 117.0(6) . . ?

O6 C45 C46 117.5(5) . . ?

C47 C46 C51 118.8(6) . . ?

C47 C46 C45 119.4(6) . . ?

C51 C46 C45 121.8(6) . . ?

C48 C47 C46 119.3(6) . . ?

C48 C47 H47 120.4 . . ?

C46 C47 H47 120.4 . . ?

C49 C48 C47 121.0(7) . . ?

C49 C48 H48 119.5 . . ?

C47 C48 H48 119.5 . . ?

C50 C49 C48 119.5(6) . . ?

C50 C49 H49 120.3 . . ?

C48 C49 H49 120.3 . . ?

C51 C50 C49 120.0(6) . . ?

C51 C50 C52 119.6(6) . . ?

C49 C50 C52 120.5(6) . . ?

C50 C51 C46 121.6(6) . . ?

C50 C51 H51 119.2 . . ?

C46 C51 H51 119.2 . . ?

O8 C52 O7 123.7(7) . . ?

O8 C52 C50 118.1(7) . . ?

O7 C52 C50 117.7(7) . . ?

 

loop_

 _geom_torsion_atom_site_label_1

 _geom_torsion_atom_site_label_2

 _geom_torsion_atom_site_label_3

 _geom_torsion_atom_site_label_4

 _geom_torsion

 _geom_torsion_site_symmetry_1

 _geom_torsion_site_symmetry_2

 _geom_torsion_site_symmetry_3

 _geom_torsion_site_symmetry_4

 _geom_torsion_publ_flag

O3 Zn2 N1 C1 -105.8(5) . . . . ?

O7 Zn2 N1 C1 147.1(5) 1_444 . . . ?

N3 Zn2 N1 C1 25.3(5) 1_545 . . . ?

O3 Zn2 N1 C5 72.1(5) . . . . ?

O7 Zn2 N1 C5 -35.0(5) 1_444 . . . ?

N3 Zn2 N1 C5 -156.8(4) 1_545 . . . ?

O5 Zn1 N4 C23 117.5(5) . . . . ?

O2 Zn1 N4 C23 26.8(5) 2_656 . . . ?

O1 Zn1 N4 C23 -153.0(5) . . . . ?

O6 Zn1 N4 C23 -64.6(5) 2_656 . . . ?

Zn1 Zn1 N4 C23 24.1(12) 2_656 . . . ?

O5 Zn1 N4 C27 -71.4(5) . . . . ?

O2 Zn1 N4 C27 -162.1(4) 2_656 . . . ?

O1 Zn1 N4 C27 18.1(5) . . . . ?

O6 Zn1 N4 C27 106.5(4) 2_656 . . . ?

Zn1 Zn1 N4 C27 -164.8(6) 2_656 . . . ?

N4 Zn1 O1 C22 175.6(5) . . . . ?

O5 Zn1 O1 C22 -85.0(5) . . . . ?

O2 Zn1 O1 C22 -3.8(9) 2_656 . . . ?

O6 Zn1 O1 C22 76.1(5) 2_656 . . . ?

Zn1 Zn1 O1 C22 -3.9(5) 2_656 . . . ?

O7 Zn2 O3 C44 -100.7(7) 1_444 . . . ?

N3 Zn2 O3 C44 36.2(7) 1_545 . . . ?

N1 Zn2 O3 C44 152.8(6) . . . . ?

N4 Zn1 O5 C45 -165.4(5) . . . . ?

O2 Zn1 O5 C45 -67.8(5) 2_656 . . . ?

O1 Zn1 O5 C45 92.8(5) . . . . ?

O6 Zn1 O5 C45 20.7(9) 2_656 . . . ?

Zn1 Zn1 O5 C45 5.3(5) 2_656 . . . ?

C5 N1 C1 C2 2.0(8) . . . . ?

Zn2 N1 C1 C2 179.9(4) . . . . ?

N1 C1 C2 C3 -2.0(9) . . . . ?

C1 C2 C3 C4 0.9(8) . . . . ?

C1 C2 C3 C6 -174.0(5) . . . . ?

C2 C3 C4 C5 0.1(8) . . . . ?

C6 C3 C4 C5 175.0(5) . . . . ?

C1 N1 C5 C4 -0.9(9) . . . . ?

Zn2 N1 C5 C4 -179.0(4) . . . . ?

C3 C4 C5 N1 -0.1(9) . . . . ?

C10 N2 C6 C7 0.8(8) . . . . ?

C10 N2 C6 C3 -175.8(5) . . . . ?

C2 C3 C6 N2 145.6(5) . . . . ?

C4 C3 C6 N2 -29.2(7) . . . . ?

C2 C3 C6 C7 -31.0(8) . . . . ?

C4 C3 C6 C7 154.2(6) . . . . ?

N2 C6 C7 C8 -1.1(9) . . . . ?

C3 C6 C7 C8 175.2(5) . . . . ?

C6 C7 C8 C9 1.1(8) . . . . ?

C6 C7 C8 C16 177.3(6) . . . . ?

C7 C8 C9 C10 -0.9(9) . . . . ?

C16 C8 C9 C10 -177.3(5) . . . . ?

C6 N2 C10 C9 -0.5(8) . . . . ?

C6 N2 C10 C13 178.7(5) . . . . ?

C8 C9 C10 N2 0.6(9) . . . . ?

C8 C9 C10 C13 -178.5(5) . . . . ?

C15 N3 C11 C12 -0.8(9) . . . . ?

Zn2 N3 C11 C12 -166.7(5) 1_565 . . . ?

N3 C11 C12 C13 -0.5(10) . . . . ?

C11 C12 C13 C14 1.0(9) . . . . ?

C11 C12 C13 C10 -179.1(6) . . . . ?

N2 C10 C13 C12 -31.4(8) . . . . ?

C9 C10 C13 C12 147.8(6) . . . . ?

N2 C10 C13 C14 148.5(6) . . . . ?

C9 C10 C13 C14 -32.3(9) . . . . ?

C12 C13 C14 C15 -0.1(9) . . . . ?

C10 C13 C14 C15 -180.0(6) . . . . ?

C11 N3 C15 C14 1.8(9) . . . . ?

Zn2 N3 C15 C14 167.9(5) 1_565 . . . ?

C13 C14 C15 N3 -1.3(10) . . . . ?

C7 C8 C16 C21 66.6(9) . . . . ?

C9 C8 C16 C21 -117.3(7) . . . . ?

C7 C8 C16 C17 -115.6(7) . . . . ?

C9 C8 C16 C17 60.5(8) . . . . ?

C21 C16 C17 C18 -0.4(10) . . . . ?

C8 C16 C17 C18 -178.4(6) . . . . ?

C16 C17 C18 C19 0.9(12) . . . . ?

C17 C18 C19 C20 -0.9(13) . . . . ?

C18 C19 C20 C21 0.5(13) . . . . ?

C19 C20 C21 C16 -0.1(11) . . . . ?

C19 C20 C21 C22 179.9(7) . . . . ?

C17 C16 C21 C20 0.0(9) . . . . ?

C8 C16 C21 C20 177.7(6) . . . . ?

C17 C16 C21 C22 -179.9(6) . . . . ?

C8 C16 C21 C22 -2.2(10) . . . . ?

Zn1 O2 C22 O1 -10.3(11) 2_656 . . . ?

Zn1 O2 C22 C21 168.6(4) 2_656 . . . ?

Zn1 O1 C22 O2 8.5(9) . . . . ?

Zn1 O1 C22 C21 -170.5(4) . . . . ?

C20 C21 C22 O2 9.5(9) . . . . ?

C16 C21 C22 O2 -170.6(6) . . . . ?

C20 C21 C22 O1 -171.5(6) . . . . ?

C16 C21 C22 O1 8.4(9) . . . . ?

C27 N4 C23 C24 -2.7(9) . . . . ?

Zn1 N4 C23 C24 168.8(5) . . . . ?

N4 C23 C24 C25 -0.4(10) . . . . ?

C23 C24 C25 C26 2.6(9) . . . . ?

C23 C24 C25 C28 -173.5(6) . . . . ?

C24 C25 C26 C27 -1.8(8) . . . . ?

C28 C25 C26 C27 174.4(5) . . . . ?

C23 N4 C27 C26 3.5(8) . . . . ?

Zn1 N4 C27 C26 -168.0(4) . . . . ?

C25 C26 C27 N4 -1.3(9) . . . . ?

C32 N5 C28 C29 1.4(8) . . . . ?

C32 N5 C28 C25 -177.9(5) . . . . ?

C26 C25 C28 N5 -6.7(8) . . . . ?

C24 C25 C28 N5 169.2(5) . . . . ?

C26 C25 C28 C29 174.0(5) . . . . ?

C24 C25 C28 C29 -10.1(9) . . . . ?

N5 C28 C29 C30 -2.7(9) . . . . ?

C25 C28 C29 C30 176.5(5) . . . . ?

C28 C29 C30 C31 2.9(8) . . . . ?

C28 C29 C30 C38 179.2(5) . . . . ?

C29 C30 C31 C32 -1.9(9) . . . . ?

C38 C30 C31 C32 -178.3(5) . . . . ?

C28 N5 C32 C31 -0.3(8) . . . . ?

C28 N5 C32 C35 178.3(5) . . . . ?

C30 C31 C32 N5 0.6(9) . . . . ?

C30 C31 C32 C35 -177.9(6) . . . . ?

C37 N6 C33 C34 -2.0(13) . . . . ?

N6 C33 C34 C35 1.9(12) . . . . ?

C33 C34 C35 C36 0.5(10) . . . . ?

C33 C34 C35 C32 -179.1(6) . . . . ?

N5 C32 C35 C34 -13.6(9) . . . . ?

C31 C32 C35 C34 165.1(6) . . . . ?

N5 C32 C35 C36 166.8(6) . . . . ?

C31 C32 C35 C36 -14.5(9) . . . . ?

C34 C35 C36 C37 -2.6(10) . . . . ?

C32 C35 C36 C37 177.0(7) . . . . ?

C33 N6 C37 C36 -0.4(14) . . . . ?

C35 C36 C37 N6 2.7(13) . . . . ?

C29 C30 C38 C39 -117.7(7) . . . . ?

C31 C30 C38 C39 58.5(8) . . . . ?

C29 C30 C38 C43 60.0(9) . . . . ?

C31 C30 C38 C43 -123.8(7) . . . . ?

C43 C38 C39 C40 -0.3(11) . . . . ?

C30 C38 C39 C40 177.4(7) . . . . ?

C38 C39 C40 C41 -0.4(13) . . . . ?

C39 C40 C41 C42 -0.8(16) . . . . ?

C40 C41 C42 C43 2.7(18) . . . . ?

C41 C42 C43 C38 -3.4(15) . . . . ?

C41 C42 C43 C44 173.6(10) . . . . ?

C39 C38 C43 C42 2.1(11) . . . . ?

C30 C38 C43 C42 -175.5(8) . . . . ?

C39 C38 C43 C44 -174.7(7) . . . . ?

C30 C38 C43 C44 7.7(11) . . . . ?

Zn2 O3 C44 O4 -8.0(14) . . . . ?

Zn2 O3 C44 C43 169.2(5) . . . . ?

C42 C43 C44 O4 11.3(14) . . . . ?

C38 C43 C44 O4 -171.9(9) . . . . ?

C42 C43 C44 O3 -166.0(9) . . . . ?

C38 C43 C44 O3 10.8(12) . . . . ?

Zn1 O5 C45 O6 -0.8(10) . . . . ?

Zn1 O5 C45 C46 178.0(4) . . . . ?

Zn1 O6 C45 O5 -7.6(10) 2_656 . . . ?

Zn1 O6 C45 C46 173.6(4) 2_656 . . . ?

O5 C45 C46 C47 30.2(8) . . . . ?

O6 C45 C46 C47 -151.0(6) . . . . ?

O5 C45 C46 C51 -152.3(6) . . . . ?

O6 C45 C46 C51 26.5(9) . . . . ?

C51 C46 C47 C48 -0.3(9) . . . . ?

C45 C46 C47 C48 177.3(6) . . . . ?

C46 C47 C48 C49 1.2(10) . . . . ?

C47 C48 C49 C50 -1.2(10) . . . . ?

C48 C49 C50 C51 0.4(9) . . . . ?

C48 C49 C50 C52 -179.5(6) . . . . ?

C49 C50 C51 C46 0.5(9) . . . . ?

C52 C50 C51 C46 -179.6(6) . . . . ?

C47 C46 C51 C50 -0.5(9) . . . . ?

C45 C46 C51 C50 -178.0(6) . . . . ?

Zn2 O7 C52 O8 15.2(10) 1_666 . . . ?

Zn2 O7 C52 C50 -171.8(4) 1_666 . . . ?

C51 C50 C52 O8 -5.6(10) . . . . ?

C49 C50 C52 O8 174.3(7) . . . . ?

C51 C50 C52 O7 -179.0(6) . . . . ?

C49 C50 C52 O7 0.9(9) . . . . ?

 

_diffrn_measured_fraction_theta_max    0.990

_diffrn_reflns_theta_full              25.05

_diffrn_measured_fraction_theta_full   0.990

_refine_diff_density_max    0.545

_refine_diff_density_min   -0.455

_refine_diff_density_rms    0.088
